# Supplementary material for: Estimation of anisotropic permeability in trabecular bone based on microCT imaging and pore-scale fluid dynamics simulations
Source: PubMed Central journal article supplement — Bone Rep. 2016 Dec 16;6:129–39. doi: 10.1016/j.bonr.2016.12.002 (PMC5408131; doi:10.1016/j.bonr.2016.12.002), 2016-12-16
Supplement: mmc1.pdf [file mmc1.pdf]

## Supplementary Data

Table 1: Comparison of permeability values for quadrupedal specimens. Values are shown as mean  $\pm$  standard deviation with corresponding porosity (where applicable).

| Study            | Species                | Permeability ( $\cdot 10^{-9}$ m <sup>2</sup> ) | Porosity        |
|------------------|------------------------|-------------------------------------------------|-----------------|
| Bovine Specimens | Bovine                 | 7.83 $\pm$ 0.33                                 | 0.84 $\pm$ 0.01 |
| [1]              | Bovine, vertebral body | 0.10 $\pm$ 0.80                                 | 0.82            |
| [2]              | Bovine, proximal tibia | 3.20 $\pm$ 10.20                                | 0.75 $\pm$ 0.03 |
| [2]              | Bovine, proximal tibia | 0.70 $\pm$ 8.30                                 | 0.75 $\pm$ 0.04 |
| [3]              | Bovine, proximal tibia | 0.001                                           | $\Phi$          |
| [3]              | Bovine, proximal tibia | 0.008                                           | $\Phi$          |
| [3]              | Bovine, proximal tibia | 0.002                                           | $\Phi$          |
| [4]              | Bovine, distal femur   | 0.40 $\pm$ 3.5                                  | 0.65 $\pm$ 0.09 |
| [4]              | Bovine, distal femur   | 0.40 $\pm$ 2.7                                  | 0.65 $\pm$ 0.09 |
| [4]              | Bovine, distal femur   | 0.20 $\pm$ 1.55                                 | 0.63 $\pm$ 0.09 |
| [5]              | Porcine, femoral head  | 0.049 $\pm$ 0.30                                | 0.49 $\pm$ 0.07 |
| [5]              | Porcine, femoral head  | 0.022 $\pm$ 0.10                                | 0.49 $\pm$ 0.07 |

Table 2: Experimental data (bovine proximal tibia) from Nauman et al. [2] in longitudinal (long) and transverse (trans) directions where the viscosity  $\mu$  is equal to 0.001 Pa·s, and  $k^{exp}$  corresponds to  $\mathbf{k}$

| $\Phi$ | $k_{int}^{exp}$ ( $10^{-9}$ m <sup>2</sup> ) | Testing Direction |
|--------|----------------------------------------------|-------------------|
| 0.67   | 4.59                                         | long              |
| 0.70   | 5.09                                         | long              |
| 0.72   | 0.95                                         | trans             |
| 0.72   | 3.47                                         | long              |
| 0.72   | 0.39                                         | trans             |
| 0.72   | 0.52                                         | trans             |
| 0.72   | 0.81                                         | trans             |
| 0.74   | 0.55                                         | trans             |
| 0.74   | 5.30                                         | long              |
| 0.74   | 0.61                                         | trans             |
| 0.75   | 7.45                                         | long              |
| 0.76   | 5.34                                         | long              |
| 0.76   | 4.69                                         | long              |
| 0.76   | 0.73                                         | trans             |
| 0.76   | 0.36                                         | trans             |
| 0.77   | 5.51                                         | long              |
| 0.77   | 2.76                                         | trans             |
| 0.77   | 6.03                                         | long              |
| 0.78   | 5.90                                         | long              |
| 0.79   | 7.18                                         | long              |
| 0.80   | 0.95                                         | trans             |
| 0.81   | 5.47                                         | trans             |
| 0.81   | 3.95                                         | long              |

### References

- [1] Lim Tae-Hong and Jung Hwa Hong. Poroelastic properties of bovine vertebral trabecular bone. *Journal of Orthopaedic Research*, 18(4):671, 2000.
- [2] E. A. Nauman, K. E. Fong, and T. M. Keaveny. Dependence of intertrabecular permeability on flow direction and anatomic site. *Annals of Biomedical Engineering*, 27(4):517–524, 1999.
- [3] JA Ochoa and BM Hillberry. Permeability of bovine cancellous bone. In *Transactions of the 38th ORS Meeting*, page 162, 1992.
- [4] Sean S Kohles, Julie B Roberts, Maureen L Upton, Christopher G Wilson, Lawrence J Bonassar, and Alyssa L Schlichting. Direct perfusion measurements of cancellous bone anisotropic permeability. *Journal of Biomechanics*, 34(9):1197–1202, 2001.
- [5] PW Hui, PC Leung, and Andy Sher. Fluid conductance of cancellous bone graft as a predictor for graft-host interface healing. *Journal of Biomechanics*, 29(1):123–132, 1996.
